# Supplementary material for: The effect of strontium and silicon substituted hydroxyapatite electrochemical coatings on bone ingrowth and osseointegration of selective laser sintered porous metal implants
Source: PubMed Central journal article supplement (PMC6953817; doi:10.1371/journal.pone.0227232), 2020-01-10
Supplement: pone.0227232.s002.pdf [file pone.0227232.s002.pdf]

**S1 Table.** Optimisation of the parameters for electrochemical deposition of SiHA and SrHA using 10 mm diameter and 3 mm thickness discs.

| <b>Coating</b> | <b>Current density<br/>(mA/cm<sup>2</sup>)</b> | <b>Deposition time<br/>(minutes)</b> | <b>Thickness<br/>(<math>\mu\text{m}\pm\text{SD}</math>)</b> |
|----------------|------------------------------------------------|--------------------------------------|-------------------------------------------------------------|
| SiHA           | 0.8                                            | 30                                   | 9.9 $\pm$ 2.7                                               |
|                | 0.8                                            | 45                                   | 19.2 $\pm$ 5.7                                              |
| SrHA           | 7.5                                            | 2.5                                  | 6.9 $\pm$ 1.4                                               |
|                | 7.5                                            | 5                                    | 14.8 $\pm$ 2                                                |
|                | 15                                             | 2.5                                  | 14.2 $\pm$ 5.2                                              |
|                | 15                                             | 5                                    | 55.6 $\pm$ 21                                               |
