# Supplementary material for: The effect of strontium and silicon substituted hydroxyapatite electrochemical coatings on bone ingrowth and osseointegration of selective laser sintered porous metal implants
Source: PubMed Central journal article supplement (PMC6953817; doi:10.1371/journal.pone.0227232), 2020-01-10
Supplement: pone.0227232.s003.pdf [file pone.0227232.s003.pdf]

**S2 Table.** Summary of surface roughness (Ra; nm) measured from 10 mm diameter and 3mm thickness discs.

| <b>Coating</b> | <b>Ra (<math>\pm</math>SD)</b> |
|----------------|--------------------------------|
| Uncoated       | 2619.65 $\pm$ 460.54           |
| PS HA          | 3123.53 $\pm$ 232.23           |
| EHA            | 4192.41 $\pm$ 405.66           |
| ESiHA          | 4387.80 $\pm$ 303.98           |
| ESrHA          | 3881.97 $\pm$ 76.37            |
