# Supplementary material for: The effect of strontium and silicon substituted hydroxyapatite electrochemical coatings on bone ingrowth and osseointegration of selective laser sintered porous metal implants
Source: PubMed Central journal article supplement (PMC6953817; doi:10.1371/journal.pone.0227232), 2020-01-10
Supplement: pone.0227232.s004.pdf [file pone.0227232.s004.pdf]

**S3 Table.** Quantification of ovine mesenchymal stem cells (MSCs) using AlamarBlue assay for all coatings on 10 mm diameter and 3mm thickness discs.

| <b>Time point (days)</b> | <b>Coating</b> | <b>Normalised AlamarBlue assay<br/>(±SD)</b> |
|--------------------------|----------------|----------------------------------------------|
| 3                        | Uncoated       | 104.3±2.5                                    |
|                          | Plasma sprayed | 105.9±3.0                                    |
|                          | HA             | 80.4±1.5                                     |
|                          | SiHA           | 87.5±6.4                                     |
|                          | SrHA           | 101.2±4.2                                    |
| 7                        | Uncoated       | 117.5±18.1                                   |
|                          | Plasma sprayed | 125±26.1                                     |
|                          | HA             | 96.8±19.2                                    |
|                          | SiHA           | 99.9±8.4                                     |
|                          | SrHA           | 126.8±41.7                                   |
| 14                       | Uncoated       | 160.5±95.3                                   |
|                          | Plasma sprayed | 184.9±64.5                                   |
|                          | HA             | 164.1±44.2                                   |
|                          | SiHA           | 86.9±44.7                                    |
|                          | SrHA           | 237.9±16.8                                   |
