# Supplementary material for: The effect of strontium and silicon substituted hydroxyapatite electrochemical coatings on bone ingrowth and osseointegration of selective laser sintered porous metal implants
Source: PubMed Central journal article supplement (PMC6953817; doi:10.1371/journal.pone.0227232), 2020-01-10
Supplement: pone.0227232.s005.pdf [file pone.0227232.s005.pdf]

**S4 Table.** Quantification of osteogenic differentiation of ovine mesenchymal stem cells (MSCs) for all coatings on 10 mm diameter and 3mm thickness discs.

| <b>Timepoint (days)</b> | <b>Coating</b> | <b>Normalised ALP assay (<math>\pm</math>SD)</b> |
|-------------------------|----------------|--------------------------------------------------|
| 3                       | Uncoated       | 10.1 $\pm$ 3.4                                   |
|                         | Plasma sprayed | 8.3 $\pm$ 1.6                                    |
|                         | HA             | 5.7 $\pm$ 1.7                                    |
|                         | SiHA           | 9.3 $\pm$ 2.7                                    |
|                         | SrHA           | 8.1 $\pm$ 1.7                                    |
| 7                       | Uncoated       | 8.7 $\pm$ 2.8                                    |
|                         | Plasma sprayed | 7.2 $\pm$ 1.8                                    |
|                         | HA             | 9.2 $\pm$ 1.4                                    |
|                         | SiHA           | 8.8 $\pm$ 4.3                                    |
|                         | SrHA           | 6.9 $\pm$ 0.9                                    |
| 14                      | Uncoated       | 12.6 $\pm$ 5.2                                   |
|                         | Plasma sprayed | 10.1 $\pm$ 5.4                                   |
|                         | HA             | 7.8 $\pm$ 0.6                                    |
|                         | SiHA           | 9.9 $\pm$ 5.8                                    |
|                         | SrHA           | 12.6 $\pm$ 3.1                                   |
